# Supplementary material for: Data-driven surrogate model for wind turbine damage equivalent load
Source: Copernicus journal article supplement (doi:10.5194/wes-2023-157), 2023-12-18
Supplement: Supplementary file [file wes-2023-157-AC2-supplement.pdf]

| Comment                                                                                                                                                                                                                                                                                                                                                                                                                                                                                                                                                                                                                                                                                                                                                                                                                                                                                                                                                                    | Response                                                                                                                                                                                                                                                                                                                                                                                                      |
|----------------------------------------------------------------------------------------------------------------------------------------------------------------------------------------------------------------------------------------------------------------------------------------------------------------------------------------------------------------------------------------------------------------------------------------------------------------------------------------------------------------------------------------------------------------------------------------------------------------------------------------------------------------------------------------------------------------------------------------------------------------------------------------------------------------------------------------------------------------------------------------------------------------------------------------------------------------------------|---------------------------------------------------------------------------------------------------------------------------------------------------------------------------------------------------------------------------------------------------------------------------------------------------------------------------------------------------------------------------------------------------------------|
| <p>There are good reasons for directly estimating DELs instead of bending moment reconstruction, but these are never provided in the manuscript. Moreover, it is explicitly stated that not only fatigue loads, but also maximal loads are of interest. Doesn't it make more sense then to reconstruct the bending moment signal and from it, extract the maximal loads and cycle count to get the DEL?</p>                                                                                                                                                                                                                                                                                                                                                                                                                                                                                                                                                                | <p>That is a valid comment. We tried to map the wind time series to the moments/forces time series, but we did not succeed. At the same time, usually in wind engineering practice, we only use the moments/forces time series to extract the ultimate and fatigue loads. Then we do not have that much use for them; therefore, if it is possible to skip a step, it would accelerate the whole process.</p> |
| <p>In lines 65–80 there's a decent literature review of surrogate models of wind energy systems using neural networks. However, some important bibliographic elements are missing. Please consider reading and adding:</p>                                                                                                                                                                                                                                                                                                                                                                                                                                                                                                                                                                                                                                                                                                                                                 | <p>Thanks for the list, part of the recommended literature are added to the introduction.</p>                                                                                                                                                                                                                                                                                                                 |
| <p>However, I wouldn't say that there's a lack of exploration of SMs. There are many SM papers showing this can work (as pointed to in the previous comment), but we still need surrogates which are flexible enough (so it's positive that in the authors approach only <math>u</math>, <math>t_i</math>, and <math>\alpha</math> are truly used as inputs) and access sufficient high-quality data, which brings me to the assertion that you are using high-resolution environmental time series. Aerodynamically speaking, something like LES is more accurate than FAST. However, the major issue with any numeric simulator is two-fold: i. wave dynamics (for offshore) are really difficult to capture, ii. the controller is almost more of a black-box than ML. This nuance needs to be added into the discussion and limitations of any simulation-driven approach. I would also focus more on the innovativeness of using temporal convolutional networks.</p> | <p>Thanks for your comments. We added some lines in the introduction and conclusion sections to address your argument.</p>                                                                                                                                                                                                                                                                                    |
| <p>Concern with the train-test data split: a convolutional network which takes into account time-dependency (TCN) is being used. Even though DEL is estimated on a 10-min basis, given the time dependency I would argue you cannot simply randomly pick 90% of the data, it needs to be sequential (so, the 9 first months of a 10 month period).</p>                                                                                                                                                                                                                                                                                                                                                                                                                                                                                                                                                                                                                     | <p>This is a lack of clarity from our side. We did not use 90% of the time series length for training and then 10% for testing. We utilized 90% of the 32726 time series each 600s and corresponding DELs for training, and use 10% for testing. This is clarified in the updated manuscript. Where the randomness comes to play is the selection of the 90% of the samples.</p>                              |
| <p>Table two as a reference to transfer learning (TL-FCNN). However, this isn't defined previously before showing up in this table.</p>                                                                                                                                                                                                                                                                                                                                                                                                                                                                                                                                                                                                                                                                                                                                                                                                                                    | <p>Yes, this is to save space and not repeat the same table. I added a sentence in the caption to explain the TL-FCNN refers to section 3.4.</p>                                                                                                                                                                                                                                                              |
| <p>Section 3.1, 3.2, 3.3 and 3.4 aren't part of the results. I would suggest a new section dedicated to data generation including now section 3.1, 3.2 and 3.3. Section 3.4. is also more part of the methodology than the actual results.</p>                                                                                                                                                                                                                                                                                                                                                                                                                                                                                                                                                                                                                                                                                                                             | <p>I updated the paper structure accordingly.</p>                                                                                                                                                                                                                                                                                                                                                             |
| <p>In figures 7b and 7c flap-wise and edge-wise aren't correct. It should be the other way around. Check figures of, e.g. Tartibu, L. K., M. Kilfoil, and A. J. Van Der Merwe. "Vibration analysis of a variable length blade wind turbine." (2012).</p>                                                                                                                                                                                                                                                                                                                                                                                                                                                                                                                                                                                                                                                                                                                   | <p>Fixed in the updated version</p>                                                                                                                                                                                                                                                                                                                                                                           |
| <p>Line 434. I don't understand the presence of SGD here. Above you mention you're using Adam (when you present the FCNN's topology).</p>                                                                                                                                                                                                                                                                                                                                                                                                                                                                                                                                                                                                                                                                                                                                                                                                                                  | <p>Fixed in the updated version</p>                                                                                                                                                                                                                                                                                                                                                                           |
| <p>In Section 3.5. you present your results in terms of errors and predictions vs. true values. However, it would be important to actually plot the load signals (time series, vs wind speed, ...) to understand the relative importance of each predicted quantity and their physical behavior.</p>                                                                                                                                                                                                                                                                                                                                                                                                                                                                                                                                                                                                                                                                       | <p>We do not take into account any time series in our predictions. However, I added both free stream and wake raw DEL for six channel distributions to the paper.</p>                                                                                                                                                                                                                                         |

|                                                                                                                                                                                                                                                                                                                                                                                                                                                                                                                                                                                                                                                                                                                                                                                                                                                                                                                |                                                                                                                                                                                                                                                          |
|----------------------------------------------------------------------------------------------------------------------------------------------------------------------------------------------------------------------------------------------------------------------------------------------------------------------------------------------------------------------------------------------------------------------------------------------------------------------------------------------------------------------------------------------------------------------------------------------------------------------------------------------------------------------------------------------------------------------------------------------------------------------------------------------------------------------------------------------------------------------------------------------------------------|----------------------------------------------------------------------------------------------------------------------------------------------------------------------------------------------------------------------------------------------------------|
| <p>Lines 466-467: ‘One may argue that including the wind time series in the y direction in the input would improve the tower bottom side-side moment R2 value. We tested this hypothesis, but it did not improve the accuracy of the TCN-FCNN model’. This is appreciated, but any claim you make needs to be substantiated. I.e., if you say you tested this hypothesis, then you need to show the results. Lines 506-507: ‘We tested the TCN-FCNN architecture to assess its ability to handle ultimate loads. During our analysis, we found that the SMs could accurately predict ultimate loads with a comparable level of precision as DEL.’ You are again affirming something without proving it. You need to show results to make such an assertion.</p>                                                                                                                                                | <p>For the sake of space, I will not include those results. However, I uploaded the trained model for DEL and ultimate loads with the databases on the Zolondo. Interested readers can download the data, and trained model to verify the statement.</p> |
| <p>You say in line 495 and around ‘The TCN-FCNN approach offers a significant benefit by examining the wind’s time series rather than solely its statistical properties. The DEL results from wind and/or wave time series oscillations. If we were to reduce these oscillations solely to wind or wave input statistics, this would undermine the accuracy of the DEL prediction.’ You mentioned that the TCN can handle the complexities of wind time series over statistics and that this undermines accuracy, but the results don’t show this. FCNN and TCN-FCNN results are similar. If you say that just wave and wind statistics are worse w.r.t. to time series (intuitively, makes sense), then you need to prove this. Either you point to a reference showing this or you present results. However, if you see some of the suggested literature there are some fine examples that make it work.</p> | <p>Thanks for the comment. I checked the examples and updated the statements accordingly.</p>                                                                                                                                                            |
| <p>Lines 513-515: ‘In contrast, the TCN-FCNN approach, which relies solely on the flow information at the turbine location, demonstrates the capability to address wake challenges without necessitating additional inputs, provided that the flow characteristics over the turbine are well-defined.’ I wouldn’t make this assertion. Wake, especially over an entire wind farm, isn’t easily captured in terms of its loads by models based on a single turbine. There are very complex phenomena like boundary layer recuperation and wake effect accumulation which make it strongly non-linear.</p>                                                                                                                                                                                                                                                                                                       | <p>I agree with nonlinearity, but what I claim is about the versatility of TCN-FCNN, which can map the inflow of a turbine in wake to its DEL. I added a couple of sentences to explain this better.</p>                                                 |
| <p>Section 3.10. There is a big problem with synthetically reducing your time series by cutting them: as you correctly point out, you’ll miss a lot of cycles. Because you’re applying an exponent (m), any missed long cycles (which are the ones you miss when you shorten the signal) will make your error explode because long cycles contribute very heavily for fatigue (even more so if your m is greater, 5, e.g.). Additionally, if you want to compare to industry, then the 10-minute window is pretty much standard.</p>                                                                                                                                                                                                                                                                                                                                                                           | <p>I added your comment to the text for clarification.</p>                                                                                                                                                                                               |
| <p>Conclusions: what is, in your opinion, the advantages of your time series TCN-FCNN approach over a statistics FCNN approach? How are these related to the operation of the turbine (e.g., rotor stops) and how to model these? What is in your opinion more important: a better model like TCN vs FCNN or including other data sources (acceleration)?</p>                                                                                                                                                                                                                                                                                                                                                                                                                                                                                                                                                  | <p>These questions are answered in the updated manuscript.</p>                                                                                                                                                                                           |

|                                                                                                                                                                                                                                                                                                                                                                                                                                                                                                                                                                                                                                                            |                                                                                                                                                                                                                                                                                                                                                              |
|------------------------------------------------------------------------------------------------------------------------------------------------------------------------------------------------------------------------------------------------------------------------------------------------------------------------------------------------------------------------------------------------------------------------------------------------------------------------------------------------------------------------------------------------------------------------------------------------------------------------------------------------------------|--------------------------------------------------------------------------------------------------------------------------------------------------------------------------------------------------------------------------------------------------------------------------------------------------------------------------------------------------------------|
| Lines 17-18 ‘The time-marching simulations are necessary for our work and research as they enable us to consider the inherent and necessary non-linearity in the wind turbine models’, can you additionally explain how aeroelastic simulations encode non-linearities?                                                                                                                                                                                                                                                                                                                                                                                    | This is out of this manuscript’s scope. However, I added some references that included some explanations.                                                                                                                                                                                                                                                    |
| Lines 50-. A quite thorough review of DTs for wind has been done but, after reading this section, there is no explicit mention to what in fact is a DT. Digital Twins are an often convoluted and overused concept, so it would be important to clearly state what in fact is a DT.                                                                                                                                                                                                                                                                                                                                                                        | I agree that DT description is all over the board, and I am not interested in entering that discussion in this paper. However, I added a short statement to distinguish the DT from SM in the manuscript.                                                                                                                                                    |
| From Section 2 it is not clear if the FCNN and TCN-FCNN training and testing samples are the same. They should be.                                                                                                                                                                                                                                                                                                                                                                                                                                                                                                                                         | They are not. I added a short statement about it to the manuscript. In short, as we take 90% of the data for training, and this is based on Sobol’s samples they have a large overlap. Also, this randomness shows generalizability of the models.                                                                                                           |
| How did you arrive at this topology present in Table 1? Was any hyperparameter tuning performed, any ablation studies? It is more correct to use search the variable space (random search, Bayesian, etc.) in an automated manner, e.g. using Optuna or keras tuner.                                                                                                                                                                                                                                                                                                                                                                                       | It is more accurate to use the Keras tuner, and discover the design space indeed. But, as this was a simple three-layer network, the architecture and hyperparameters were obtained experimentally.                                                                                                                                                          |
| Lines 205-: ‘CNNs have been used and are well known for classification purposes (Long et al., 2015). CNNs basics are well studied in the literature, and the interested reader is referred to Goodfellow et al. (2016); Long et al. (2015). Research has shown that TCN is better than Recurrent Neural Network (RNN) and LSTM in terms of performance, implementation, flexibility and versatility (Fawaz et al., 2019; Bai et al., 2018).’ – When you refer that TCN are better than LSTMs and RNNs, is this also in the context of classification problems? It should be clear for the reader that you are using convolutional networks for regression. | They also perform better than LSTM and RNN for classification according to the cited literature. However, for our purpose, we only talk about regression. This is clarified in the updated manuscript.                                                                                                                                                       |
| Line 209: ‘a) the length of the output and input is the same’. How do you ensure (a) - length(input)=length(output) - if you have a time series of 10-minutes, but you only have a single 10-min value for DEL?                                                                                                                                                                                                                                                                                                                                                                                                                                            | Here we only talk about TCN and not TCN-FCNN. The output of the TCN part of the proposed architecture is equal to the length of the input. Then, it goes through the FCNN part to turn into a zero-dimension array (DEL).                                                                                                                                    |
| Figure 3a and 3b. From both figures, it appears to me that the dilation factor already serves as a sort of dropout, or am I interpreting it incorrectly?                                                                                                                                                                                                                                                                                                                                                                                                                                                                                                   | Your interpretation is right.                                                                                                                                                                                                                                                                                                                                |
| Figure 4. Average pooling isn’t defined elsewhere in the text.                                                                                                                                                                                                                                                                                                                                                                                                                                                                                                                                                                                             | I added a reference to Goodfellow’s book for the interested reader to read about different layers in a NN architecture.                                                                                                                                                                                                                                      |
| How did you arrive at the topology in Table 2? Also, if you’re learning in the latent space, what is usually done (e.g. with an autoencoder) is to then have a read-out where the number of neurons per layer increases, e.g. 8,16,32. How were the number of neurons of the presented hidden layers selected?                                                                                                                                                                                                                                                                                                                                             | The latent space here refers to a representation of the data in lower dimensions while it preserves the important qualities of the data. Therefore, it doesn’t need to be an AE. The number of neurons and the FCNN architecture are obtained experimentally. It was not an efficient way, but it was the best the authors knew at the time of this project. |

|                                                                                                                                                                                                                                                                                                                                                                                                                                                                                                                                                                                                                                                                                                                                                                                                                                                                            |                                                                                                                                                                                                                                                                                                                                                                                                                      |
|----------------------------------------------------------------------------------------------------------------------------------------------------------------------------------------------------------------------------------------------------------------------------------------------------------------------------------------------------------------------------------------------------------------------------------------------------------------------------------------------------------------------------------------------------------------------------------------------------------------------------------------------------------------------------------------------------------------------------------------------------------------------------------------------------------------------------------------------------------------------------|----------------------------------------------------------------------------------------------------------------------------------------------------------------------------------------------------------------------------------------------------------------------------------------------------------------------------------------------------------------------------------------------------------------------|
| <p>Line 293-294: ‘neq is the equivalent number of load cycles which is usually the length of the simulation in s.’ By writing that neq is usually the length of the simulation it induces the reader to believe that neq is variable. Neq is a fixed number we use (almost invariable 10e7, or lifetime DEL, or 1Hz DEL [which the authors use]) that enables us to compare different dynamic load timeseries by introducing the concept of equivalent load. This must be a constant throughout any period you are comparing (like the Wöhler exponent, it must remain constant). I don’t understand what is meant here with neq = s. Additionally, what is the resolution of the DELs? 10-mins? This becomes clearer in subsequent sections, but it should be clearly stated when you introduce DELs that you’re going to calculate them for a 10-minute time window.</p> | <p>Valid points. Neq here is the length because we are at 1Hz sampling. It is clarified in the updated manuscript.</p>                                                                                                                                                                                                                                                                                               |
| <p>In Equation (6), why isn’t the mean wind speed also dependent on time?</p>                                                                                                                                                                                                                                                                                                                                                                                                                                                                                                                                                                                                                                                                                                                                                                                              | <p>TurbSim combines the mean wind speed profile over the rotor, which includes shear and veer depending on height, with turbulent fluctuations that have zero mean. The mean wind speed doesn’t depend on time. A short explanation was added to the updated manuscript.</p>                                                                                                                                         |
| <p>Lines 373-374: ‘For training and testing purposes, we only took into account nine synthetic wind time series in x direction out of 225 synthetic wind time series.’ Does this mean that only 9 timeseries were used for training/testing or that only 9 points in the rotor plane were selected?</p>                                                                                                                                                                                                                                                                                                                                                                                                                                                                                                                                                                    | <p>The nine indicated points on the rotor time series are utilized for training and testing. It is clarified in the updated manuscript.</p>                                                                                                                                                                                                                                                                          |
| <p>Lines 431-432: ‘Rather than training the SMs on all the training data, the training data set is divided into batches of 256 samples.’ This sentence induces the reader into a wrong idea. Batch training is ‘training on all the training data’. The model still see the full dataset set for each epoch, just divided into batches.</p>                                                                                                                                                                                                                                                                                                                                                                                                                                                                                                                                | <p>Agreed. It is clarified in the updated manuscript.</p>                                                                                                                                                                                                                                                                                                                                                            |
| <p>In lines 465-466 you notice how the accelerations improve the performance, specifically for the tower bottom. It is however interesting how the greatest improvement is at the bottom and not the top, where you have the sensor installed. Could you perhaps expand on this, why does it happen and specifically the relation (or relative lack thereof) between tower bottom’s bending moment and the structural dynamics at the rotor level.</p>                                                                                                                                                                                                                                                                                                                                                                                                                     | <p>The side-side tower top moment is mainly a result of the wind turbine rotor torque, and it is not affected by the tower top side-side acceleration. However, the tower’s bottom side-side bending is caused by the side-side forces at the tower top, which in this case is represented by the side-side acceleration. It is explained in the updated manuscript.</p>                                             |
| <p>Line 482. You say that FCNN ‘needs input variables that may not be available all the time’. But this critique can also be made of TCN-FCNN and even more so: the probability of models based on 1Hz data failing is greater than on 10-min statistics.</p>                                                                                                                                                                                                                                                                                                                                                                                                                                                                                                                                                                                                              | <p>This is a valid point. But, here, I am not necessarily talking about this model. This model is an example of a model that can map wind time series to DEL. Regarding the FCNN, in reality, the TI and wind shear are not necessarily available in what a SCADA collects. However, this methodology will hopefully work with wind speed time series measurements. This is clarified in the updated manuscript.</p> |
| <p>One challenge here is to free the input from the time series’ length, which is not within the scope of this study.’ What is meant by this?</p>                                                                                                                                                                                                                                                                                                                                                                                                                                                                                                                                                                                                                                                                                                                          | <p>So, in this manuscript, we trained a model to map 10-minute time series to DEL. Each of these 10-minute wind time series has a specific mean wind speed, shear, and TI. However, in reality, these things are changing in 10 minutes. Therefore, in the future, it is important to improve the model to be able to map the changing wind time series to DEL.</p>                                                  |
